# Supplementary material for: Multifunctional FeS2@SRF@BSA nanoplatform for chemo-combined photothermal enhanced photodynamic/chemodynamic combination therapy
Source: Royal Society of Chemistry journal article supplement (doi:10.1039/d1bm01597d), 2021-11-16
Supplement: d1bm01597d1.pdf [file d1bm01597d1.pdf]

## Supporting Information

### **Multifunctional FeS<sub>2</sub>@SRF@BSA nanoplatform for chemo- combine photothermal enhanced photodynamic/ chemodynamic combination therapy**

Miao Feng<sup>a</sup>, Meiting Li<sup>a</sup>, Rui Dai<sup>a</sup>, Shuting Xiao<sup>a</sup>, Junjie Tang<sup>a</sup>, Xiaoge Zhang<sup>a</sup>,  
Baizhu Chen<sup>a,\*</sup> and Jie Liu<sup>a,\*</sup>

*<sup>a</sup> School of Biomedical Engineering, Shenzhen Campus of Sun Yat-sen University, No.  
66, Gongchang Road, Guangming District, Shenzhen, Guangdong 518107, P.R.  
China*

\*E-mail: chenbzh8@mail.sysu.edu.cn; liujie56@mail.sysu.edu.cn.

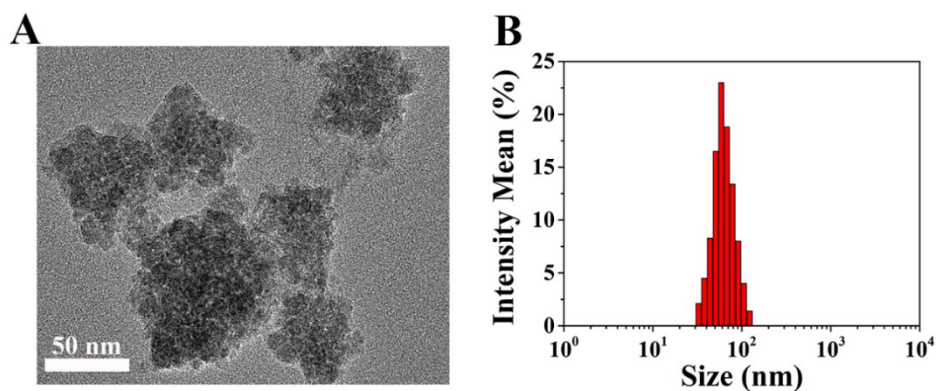

Fig S1. (A) TEM image and (B) particle size distribution of  $\text{FeS}_2@\text{SRF}@\text{BSA}$  NPs after incubation with the supernatant of lysed 4T1 cells.

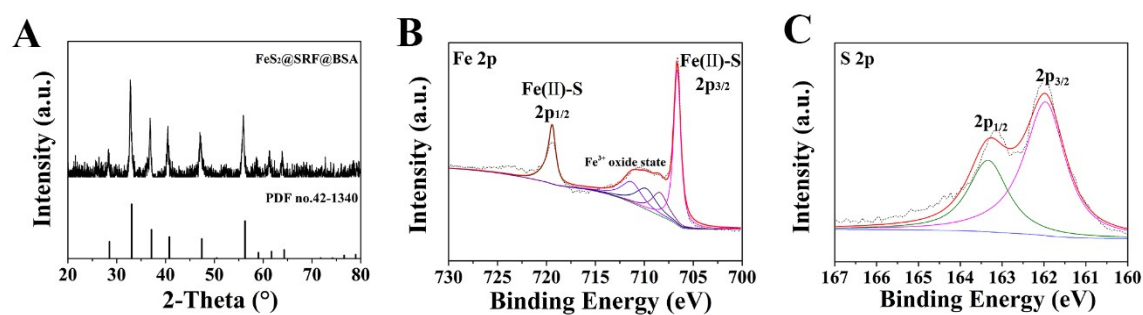

Fig S2. (A) XRD of  $\text{FeS}_2@\text{SRF}@\text{BSA}$  NPs. (B) XPS spectra of Fe 2p and (C) S 2p for  $\text{FeS}_2@\text{SRF}@\text{BSA}$  NPs.

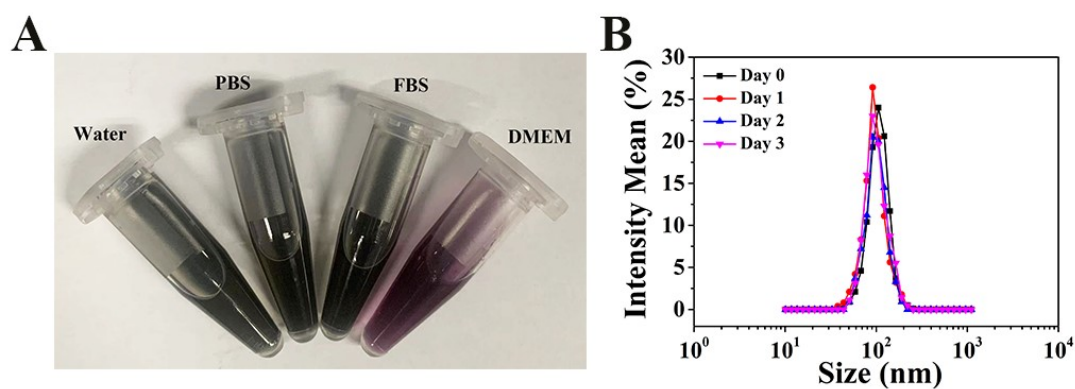

Fig S3. (A) Photos of  $\text{FeS}_2@\text{SRF}@\text{BSA}$  NPs dispersed in different solvents (water, PBS, FBS and DMEM). (B) Hydrodynamic radius of  $\text{FeS}_2@\text{SRF}@\text{BSA}$  NPs in PBS for 3 days.

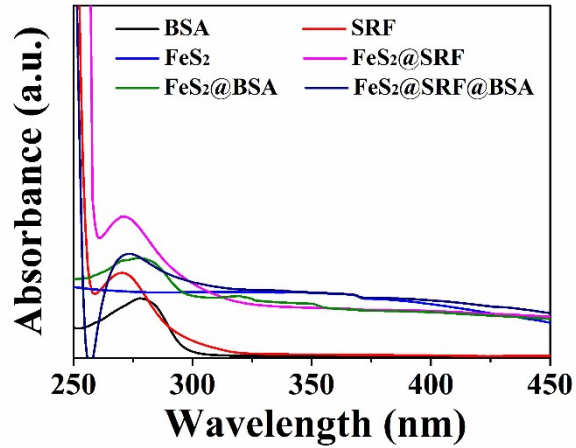

Fig S4. UV-Vis absorbance spectra of BSA, SRF, FeS<sub>2</sub> NPs, FeS<sub>2</sub>@SRF NPs, FeS<sub>2</sub>@BSA NPs and FeS<sub>2</sub>@SRF@BSA NPs.

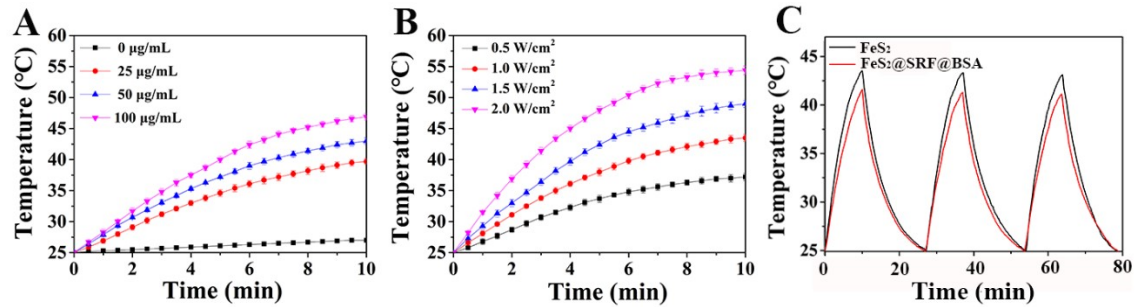

Fig S5. Temperature increment curves of FeS<sub>2</sub> suspensions at (A) different concentrations and (B) irradiation densities. (C) Three cycles of temperature variation of FeS<sub>2</sub> and FeS<sub>2</sub>@SRF@BSA solution with continuous laser irradiation (808 nm, 1.0 W/cm<sup>2</sup>, 10 min) and natural cooling.

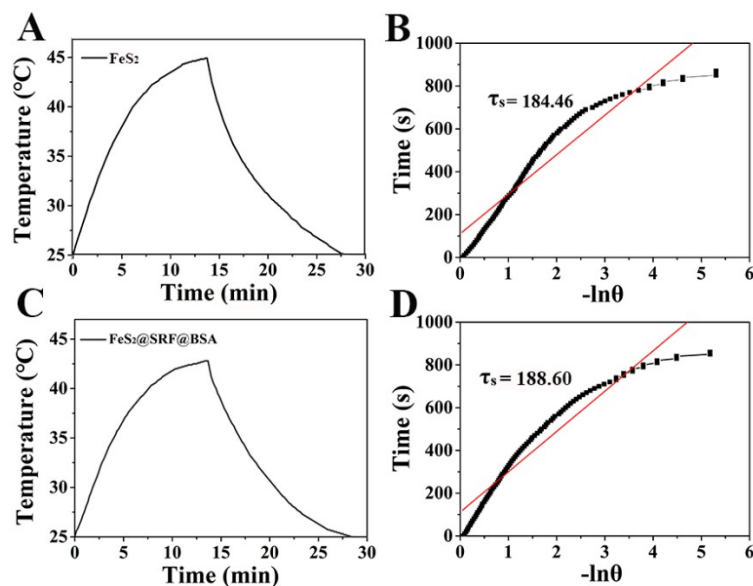

Fig S6. Photothermal effect of aqueous dispersion of (A) FeS<sub>2</sub> and (C) FeS<sub>2</sub>@SRF@BSA solution under irradiation with the NIR laser. Laser was then shut off after reaching the steady maximum

temperature. Linear time data vs  $-\ln(\theta)$  gained from the cooling period of (B)  $\text{FeS}_2$  and (D)  $\text{FeS}_2@\text{SRF}@BSA$  NPs to get the  $\tau_s$ .

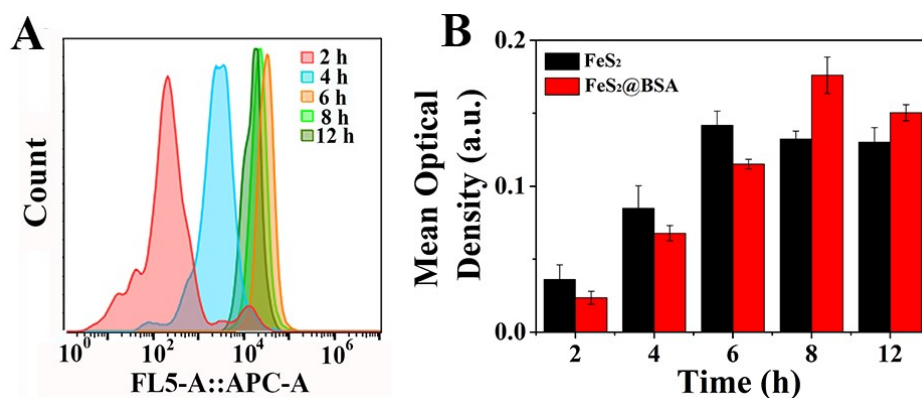

Fig S7. (A) Fluorescence histograms of the 4T1 cells incubated with  $\text{FeS}_2@\text{C6}$  NPs for different time. (B) Fluorescence semi-quantitative analysis of fluorescence images in Fig 3C.

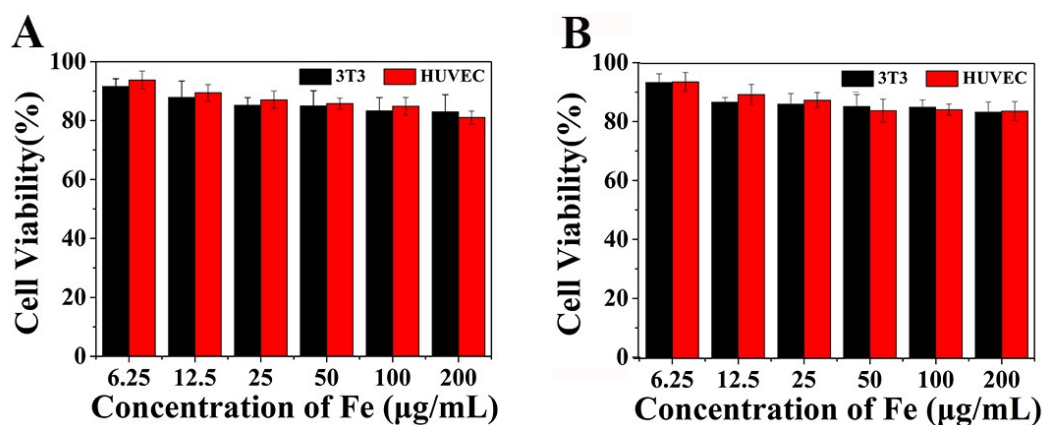

Fig S8. Viabilities of HUVECs cells and 3T3 cells incubated with various concentrations of (A)  $\text{FeS}_2$  NPs and (B)  $\text{FeS}_2@\text{BSA}$  NPs.

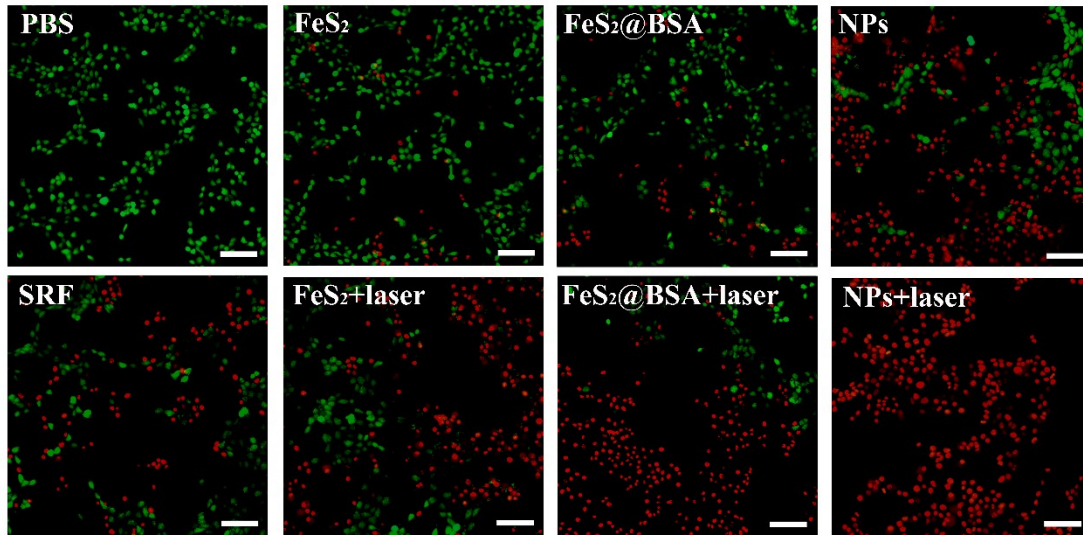

Fig S9. Fluorescence microscopy images of 4T1 cells stained with PI and Calcein-AM after treating with the NPs for 8 h with or without NIR laser irradiation (808 nm, 1.0 W/cm<sup>2</sup>, 5 min), where NPs in the figure refers to the FeS<sub>2</sub>@SRF@BSA NPs. (Scale bar: 100 μm)

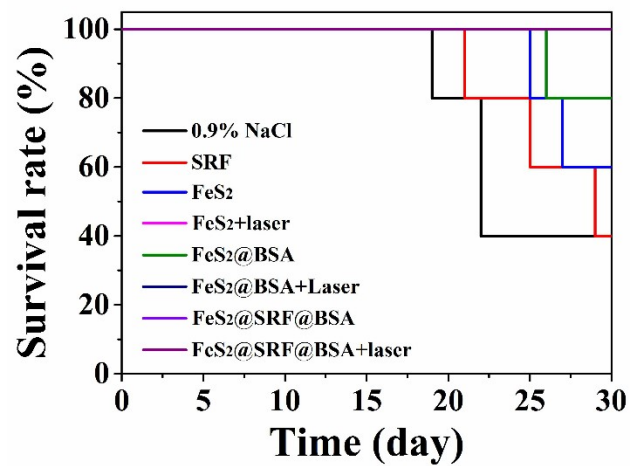

Figure S10. The survival rates of the mice after different treatments. The endpoint was considered when mice died or the tumor was larger than 1500 mm<sup>3</sup> (n=5).

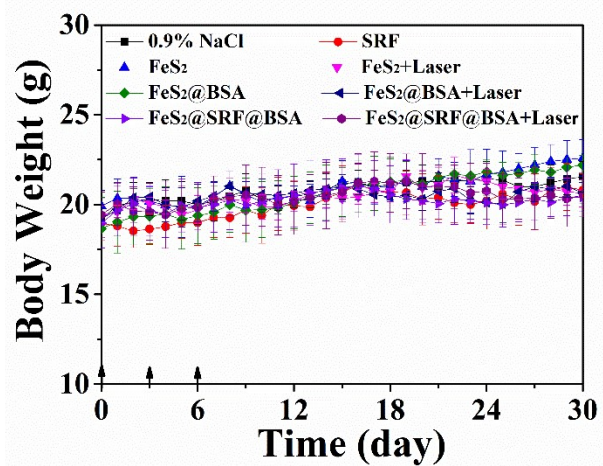

Fig S11. Variations of body weight scaled during various treatments.

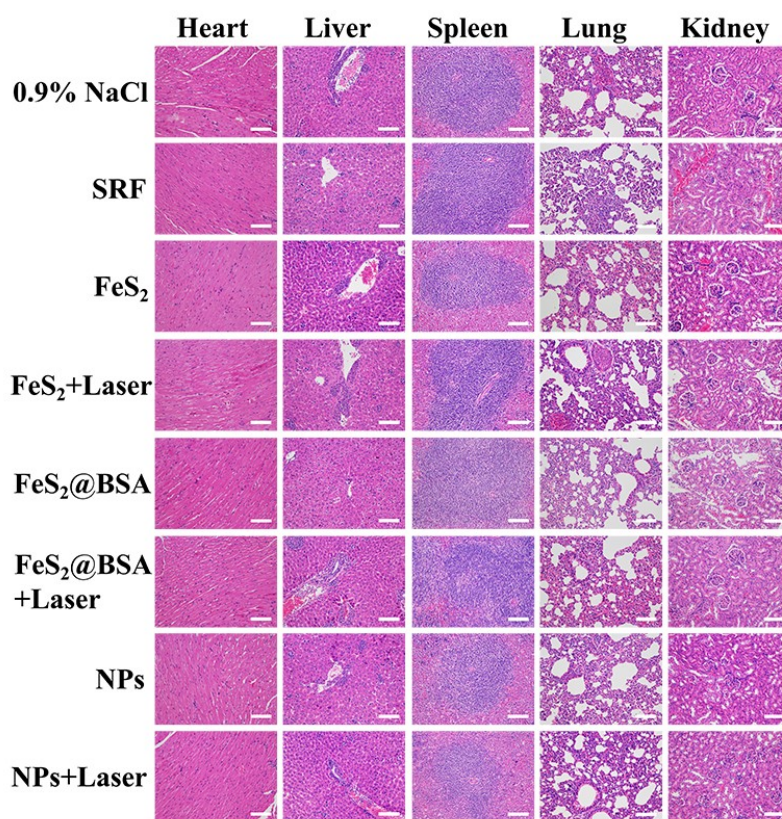

Fig S12. H&E staining of tissues dissected from the mice in various groups, where NPs in the figure refers to the FeS<sub>2</sub>@SRF@BSA NPs. (Scale bars: 100 μm)

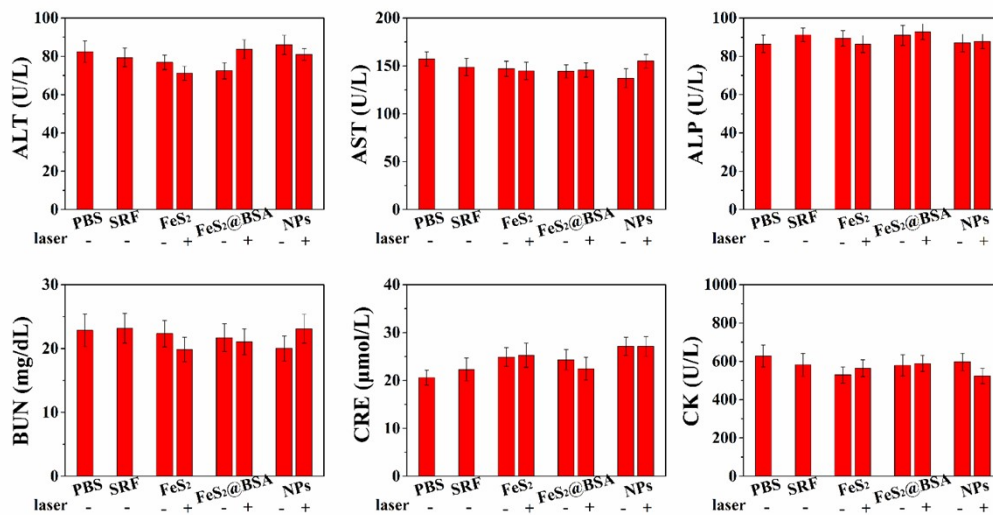

Fig S13. Blood biochemical analysis of mice at 30 days after injection of NPs, where NPs in the figure refers to the FeS<sub>2</sub>@SRF@BSA NPs. (5 mg of Fe/kg mouse, 100 μL, n = 5, Mean ± S.D.)
